# 1 ***TailTimer*: an open-source device for automating the rodent** 2 **tail immersion assay**

3 Mallory E. Udell,<sup>1</sup> Angel Garcia Martinez,<sup>1</sup> Tengfei Wang,<sup>1</sup> Jie Ni,<sup>1</sup> Christian Hurt,<sup>2</sup> Megan  
4 Mulligan,<sup>3</sup> Eva E. Redei,<sup>4</sup> and Hao Chen<sup>1</sup>

5  
6 <sup>1</sup>Department of Pharmacology, Addiction Science, and Toxicology, University of Tennessee  
7 Health Science Center, Memphis, TN 38103, USA

8 <sup>2</sup>Undergraduate Program, University of Michigan, Ann Arbor, MI 48109, USA

9 <sup>3</sup>Department of Genetics, Genomics, and Informatics, University of Tennessee Health Science  
10 Center, Memphis, TN 38103, USA

11 <sup>4</sup>Departments of Psychiatry and Behavioral Sciences, and Physiology, Northwestern University,  
12 Feinberg School of Medicine, 303 E. Chicago Avenue, Chicago, IL 60611, USA

13

14 Corresponding Author:

15 Hao Chen<sup>1</sup>

16 71 S Manassas Street, Memphis, TN 38103, USA

17 Email: [hchen@uthsc.edu](mailto:hchen@uthsc.edu)

## 18 **Abstract**

19 The tail immersion assay is a widely used method for measuring acute thermal pain in a way  
20 which is quantifiable and reproducible. It is non-invasive and measures response to a stimulus  
21 that may be encountered by an animal in its natural environment. However, tail withdrawal  
22 latency data are usually collected manually, and precise temperatures of the water at the time of  
23 measurement are most often not recorded. These two factors can reduce the reproducibility of  
24 tail immersion assay data. We designed a device, *TailTimer*, which uses the Raspberry Pi single-  
25 board computer and a temperature sensor, to automatically record both tail withdrawal latency  
26 and water temperature. The device has a radio frequency identification (RFID) system that can  
27 record the ID of animals. Our software recognizes several specific RFID keys as user interface  
28 commands, which allows *TailTimer* to be operated via RFID fobs. We also programmed the  
29 device to only allow tests to be conducted when the water is within  $\pm 0.25$  °C of the target  
30 temperature. Data recorded using the *TailTimer* device showed a linear relationship between tail  
31 withdrawal latency and water temperature when tested between 47 - 50 °C. We also observed a  
32 profound effect of water mixing speed on tail withdrawal latency. Our data further revealed  
33 significant strain and sex differences, valorizing *TailTimer* in its ability to detect genetically-  
34 determined variations in thermal pain sensitivity.

## 35 **Significance Statement**

36 Quantification of tail withdrawal latency in response to thermal pain has essentially remained the  
37 same since the method was first introduced decades ago and relies on manual recording of water  
38 temperature and tail withdrawal latency. Such manual methods engender relatively substantial  
39 variability and are potential contributors to some of the discrepancies present among relevant  
40 research. The open source *TailTimer* device we report here is simple and inexpensive to

41 manufacture. The RFID-based user interface is ergonomic, especially in animal facilities where  
42 space is limited and gloves are mandatory. We anticipate that the increased reproducibility of tail  
43 withdrawal latency provided by *TailTimer* will augment its utility in nociception and addiction  
44 research.

## 45 **Introduction**

46 Extant research has utilized an assortment of methods to measure and understand nociception  
47 relative to the specific type of pain being assessed. Both acute and chronic pain can be modeled  
48 in rodents. Moreover, pain can be induced through the use of various types of stimuli including  
49 thermal, electrical, chemical, and mechanical. In order to properly assess acute pain, it is  
50 imperative that the noxious stimuli meets the requirements of being quantifiable, reproducible,  
51 and non-invasive. Furthermore, the stimulation must be delivered promptly and briefly enough to  
52 induce synchronous excitation of the nerve fibers (Le Bars et al., 2001). For this reason, neither  
53 mechanical nor chemical stimulation are adequate for studying acute pain. Electrical stimulation,  
54 though specific, is disadvantageous in that it does not reflect a type of stimuli that an animal  
55 would encounter in its natural environment. The use of thermal stimulation is therefore  
56 conducive for modeling acute pain, as heat is more selective and naturally encountered (Le Bars  
57 et al., 2001).

58 The tail immersion assay is a thermal assessment of pain that is often used to determine  
59 the analgesic properties of drugs. The assay measures pain by immersing a rat's tail in hot water  
60 and recording the time it takes before a tail flick (i.e., pain response) is observed. However,  
61 current standards for data collection often rely on manual recording and monitoring, inviting an  
62 increased likelihood for error. The use of manual methods may thereby contribute to some of the  
63 inconsistent findings among previous pain studies (Fischer et al., 2008; Picker et al., 2011).  
64 Thus, the development of a more reliable method for this simple assay is warranted.

65 The current study describes the open source *TailTimer* device as an automated method  
66 for measuring acute thermal pain using the tail immersion assay. This device uses a single-board  
67 computer (i.e., Raspberry Pi 3, RP3), which offers an affordable alternative to desktop computers  
68 without compromising capability. In addition, RP3 can be paired with a variety of devices and  
69 sensors to offer controllability of a wide range of internal and environmental variables. Here, we  
70 added a digital temperature probe and a radiofrequency identification (RFID) system. This  
71 automated method abates the burden of data recording while, more importantly, ensuring precise  
72 measurement of tail withdrawal latencies and water temperature.

## 73 **Materials and Methods**

### 74 **Hardware**

75 The *TailTimer* is composed of a Raspberry Pi 3 (Model B, RaspberryPi Foundation, UK) single-  
76 board computer (RP3), a 5-inch touch screen (DFR0550, DFRobot, ShangHai, China), a  
77 waterproof digital temperature sensor (DS18B20, Adafruit Industries, NY, USA), an RFID  
78 reader (EM4100, 125 kHz, HiTag, available at Amazon.com), and two electrical wires. The  
79 ground wire is connected to one of the ground pins of the general purpose input/output (GPIO),  
80 and the latency wire is connected to GPIO 18 (pin 12). All components are enclosed in a 3D-  
81 printed case (see Fig. S1). The connection of the components is outlined in Fig. 1. The  
82 temperature sensor connects to the RP3 via a one-wire serial interface to provide continuous

83 temperature readings. The RFID reader connects to the RP3 via a USB port. It scans an RFID  
84 chip embedded under the skin of a rat. Each RFID chip contains a unique code that serves as the  
85 ID of a rat. During operation, the ground wire and thermal probe remain immersed together in  
86 the hot water at approximately 50% of the depth. The latency wire is dipped into the hot water at  
87 the same time as a rat's tail and is taken out of the hot water, together with the tail, when a pain  
88 response is observed (i.e., the tail starts to "flick" in response to heat).

89

### 90 **Hot water**

91 A standard hot plate (Thermolyne Cimarec 1, Model SP46615) was used to heat a 1 L beaker  
92 containing 900 ml tap water. Water temperature was adjusted to  $48 \pm 0.25$  °C. To ensure  
93 homogeneity of the temperature, a 2 cm magnetic stir bar was used to mix the water at a  
94 consistent, low speed (setting one on the hot plate). Approximately 9 g of NaCl (1%) was added  
95 to increase conductivity of the water, as required for automated recording of the open/close state  
96 between the ground and latency wires.

97

### 98 **Software features, user interface, and testing procedure**

99 *TailTimer* has a computer program written in the Python language. It collects information from  
100 the temperature probe and the RFID reader and logs the number of seconds during which the  
101 circuit between the latency wire and the ground wire is in the close state (i.e., tail withdrawal  
102 latency). A text-based user interface is automatically started when the device is powered on. It  
103 first prompts the user to input a username, set the target temperature, and test the connection of  
104 the wires. Measures of tail withdrawal latency are then initiated by entering the ID of the rat.  
105 This can be achieved by scanning the RFID embedded under the skin of the rat using the USB  
106 RFID reader or by entering the ID via a keyboard. The interface then prompts the user to dip the  
107 rat's tail, together with the latency wire, into the hot water at a depth of approximately 4 cm. A  
108 timer starts when the latency wire contacts the water and stops when it is withdrawn. Tails were  
109 removed from the water if the rat failed to elicit a response after 10 s. Each rat was tested at least  
110 twice. Additional testing was conducted when the difference between a rat's latencies exceeded  
111 1.5 s. The software enforces a rest period of 10 s in between tests. Assessments can only be  
112 performed when the water is within 0.25 °C of the target temperature. The device produces  
113 continuous water temperature updates and displays warnings when the temperature falls out of  
114 the target range. All relevant data are automatically recorded by the program. The user can  
115 operate the program using a keyboard. However, the RFID system offers a more convenient  
116 alternative by encoding the limited number of answers to the user interface questions in RFID  
117 fobs with each fob representing one unique answer. A total of six fobs (one each for entering the  
118 user ID, setting the target temperature, starting a new rat, testing the same rat again, deleting the  
119 last latency, and exiting the program) are needed for all operations. Data gathered from the  
120 device are transferred using a standard USB drive.

121

### 122 **Software accessibility**

123 The software and design of the 3D enclosure (Fig. S1) described in the paper are freely available  
124 in the Github repository at <https://github.com/chen42/openbehavior/tree/master/tailTimer>.

125

### 126 **Animals**

127 The study was conducted on a total of 45 inbred male and female rats, comprised of three strains:  
128 Spontaneously Hypertensive (SHR/NCrI,  $n = 8$ ), Wistar Kyoto more-immobile (WMI,  $n = 15$ ),

129 and Wistar Kyoto less-immobile (WLI,  $n = 22$ ). All rats were naïve to drugs and between 55 and  
130 74 days old at the start of testing. Testing was conducted over the course of two consecutive  
131 days. Breeders of the WMI and WLI strains were obtained from Dr. Redei, and the colony was  
132 maintained at The University of Tennessee Health Science Center. The rats were housed in  
133 groups of two to four without enrichment and maintained in a temperature-controlled room on a  
134 12 h dark/light cycle with lights on at 9:00 pm. Food and water were provided *ad libitum*. This  
135 study was conducted in accordance with the NIH Guidelines concerning the Care and Use of  
136 Laboratory Animals. All procedures were approved by the Animal Care and Use Committee of  
137 The University of Tennessee Health Science Center.

138

### 139 **Measuring tail withdrawal latency in animals under different conditions**

140 Pain assessments were conducted on six WMI males using various water temperatures and  
141 mixing speeds. We performed the tail immersion assay on each rat using three different water  
142 stirring settings: low speed (setting one), high speed (setting seven), and still (setting turned off)  
143 at a temperature of  $48 \pm 0.25$  °C. We also tested these males at adjusted target temperatures of  
144 47, 49, and 50 °C when the water was mixing at a constant low speed (setting one). During  
145 testing, the animals were held without restraint. All assessments were performed by the same  
146 female human investigator.

147

### 148 **Statistical analyses**

149 Data were presented as means  $\pm$  SEM. Differences were considered significant at  $p < 0.05$ .  
150 ANOVAs were performed to test for main effects of water temperature with four levels (47, 48,  
151 49, and 50 °C) and water mixing speed with three levels (low, medium, and high) on tail  
152 withdrawal latency data. Linear regression analysis using the  $R^2$  statistic was conducted to  
153 further assess the relationship between water temperature and tail withdrawal latency. We also  
154 tested for possible strain-by-sex interactions. Tukey HSD *post hoc* tests were performed to  
155 evaluate between-group differences by sex and strain. All analyses were conducted on a laptop  
156 computer running macOS High Sierra 10.13.6 using the R-statistical software.

## 157 **Results**

158 We designed the *TailTimer* device to quantify tail withdrawal latency automatically by  
159 measuring the open time of a circuit between a ground wire that remains immersed in a  
160 conductive salt solution and a latency wire that is first dipped into and then withdrawn from the  
161 solution together with a tail when the tail starts to “flick” in response to heat. We first calibrated  
162 the device’s accuracy of timing by comparing *TailTimer* against two trained technicians. We  
163 simulated the assay by dipping the latency wire into and then out of the solution and  
164 subsequently compared the latencies recorded using a stopwatch against those recorded by  
165 *TailTimer*. We found that *TailTimer* consistently reports approximately 0.4 s shorter latencies  
166 than the stopwatch. To account for this, we programmed *TailTimer* to add 0.4 s to each trial.

167

### 168 **Water temperature influences tail withdrawal latency**

169 Six male WMI rats were used to assess tail withdrawal latency at four different water  
170 temperatures. Results of a one-way ANOVA revealed a significant main effect of temperature on  
171 tail withdrawal latency,  $F_{(3,47)} = 50.93$ ,  $p < 0.001$ , in which latencies were significantly longer at  
172 lower water temperatures and shorter at higher temperatures. Moreover, the difference between

173 latencies measured at 48 versus 49 °C was especially great, with a mean difference of 1.02 s  
174 between these two temperatures ( $p < 0.0002$ ). As illustrated in Fig. 2A, results of the linear  
175 regression analysis also revealed a significant relationship between water temperature and  
176 latency,  $F_{(1,49)} = 156.2$ ,  $p < 0.001$ , with an  $R^2$  of 0.76. The strong linear relationship indicated that  
177 the withdrawal latency measured by *TailTimer* is highly accurate.

178

### 179 **Water mixing speed influences tail withdrawal latency**

180 During prior experimentation, we observed an effect of water mixing speed on tail withdrawal  
181 latency. Therefore, we used six male WMI rats to systematically measure tail withdrawal latency  
182 at 48 °C under three different water mixing speeds. An ANOVA yielded a significant main effect  
183 of the water mixing speed on tail withdrawal latency,  $F_{(2,35)} = 110.3$ ,  $p < 0.001$ . *Post hoc* analysis  
184 (Fig. 2B) revealed significantly shorter latencies at the high spin setting ( $2.94 \pm 0.2$  s) relative to  
185 the low ( $4.0 \pm 0.14$  s) and no spin ( $8.63 \pm 0.45$  s) conditions. Similarly, latencies were  
186 significantly longer when the water was still versus spinning at a low speed ( $p < 0.001$ ).  
187 Together, these data elucidate the importance of maintaining consistent mixing speed of the  
188 water across experiments. For modified setups, including the utilization of hot water baths,  
189 spatial heat gradients should be defined and water temperature should be adjusted accordingly.

190

### 191 **Biological differences in pain sensitivity can be detected by *TailTimer***

192 We proceeded to use *TailTimer* to detect biological differences (i.e., strain and sex) in thermal  
193 pain sensitivity. We measured tail withdrawal latency in three inbred strains of both male and  
194 female rats. Results of the two-way ANOVA revealed significant sex differences,  $F_{(1,197)} =$   
195  $9.517$ ,  $p < 0.01$ , in which female rats exhibited overall shorter latencies ( $3.81 \pm 0.09$  s) relative to  
196 their male counterparts ( $4.27 \pm 0.14$  s). A significant main effect of strain was also discovered,  
197  $F_{(2,197)} = 149.304$ ,  $p < 0.001$ . Interestingly, SHR rats displayed significantly longer latencies  
198 ( $6.55 \pm 0.29$  s) compared to the WLI ( $3.94 \pm 0.07$  s) and WMI strains ( $3.43 \pm 0.07$  s), which were  
199 not significantly different from each other. Most notably, results of the analysis revealed a  
200 significant strain-by-sex interaction,  $F_{(2,197)} = 7.582$ ,  $p < 0.001$ . These results are illustrated in  
201 Fig. 3. Significant sex differences were shown within the SHR strain in which latencies were  
202 longer in males ( $7.2 \pm 0.32$  s) versus females ( $5.82 \pm 0.4$  s). Furthermore, *post hoc* results  
203 indicated a significant difference between WLI and WMI males ( $p < 0.001$ ) but not between  
204 WLI and WMI females. Specifically, we observed significantly longer latencies in WLI males  
205 ( $4.12 \pm 0.09$  s) versus WMI males ( $3.4 \pm 0.11$  s). Together, these findings valorize the *TailTimer*  
206 device in its ability to detect genetically-determined differences in thermal pain sensitivity.

## 207 **Discussion**

208 The purpose of the current study was to develop an automated device for measuring pain  
209 sensitivity using the tail immersion assay. Automating data collection and monitoring of  
210 variables (e.g., water temperature) abates the burden of data recording while, more importantly,  
211 ensuring precise latency measures and water temperature regulation. *TailTimer* records tail  
212 withdrawal latency automatically by quantifying the close time of a circuit between a ground  
213 wire immersed in a conductive (1%) salt solution and a latency wire that is first dipped into and  
214 then withdrawn from the solution, together with a tail, at the first indication of pain (i.e., tail  
215 flick). This device is simple to operate and avoids the need to use a stopwatch. It only allows  
216 tests to be conducted when water is within  $\pm 0.25$  °C of a set target which, in turn, enhances the



217 reproducibility of findings. The technician, however, still needs to observe the movement of the  
218 tail carefully and decide when to withdraw the tail and wire from the solution. A single  
219 technician should be designated to administer all assessments.

220 Because tail withdrawal latency is determined by water temperature, we designed the  
221 software to only allow tail withdrawal to be measured within a limited range (i.e.,  $\pm 0.25$  °C).  
222 The results of our experimentation conducted on six WMI males using an assortment of target  
223 temperatures (47, 48, 49, and 50 °C) further demonstrated the effect of temperature on tail  
224 withdrawal latency. As shown in Fig. 2A, we found a significant negative relationship between  
225 increasing water temperature and latency length. In choosing a temperature for the assay, it is  
226 important to consider how different temperatures may be optimal based on the goal of the study.  
227 As the current study focused on distinguishing differences in baseline pain sensitivity, it was  
228 important to select a temperature low enough to be capable of showing variability between  
229 groups but high enough to reliably induce a robust pain response. Thus, 48 °C modeled an  
230 optimal temperature across the strains and sexes tested.

231 Although it is not commonly reported, water mixing speed is likely another factor  
232 contributing to some discrepancies among previous literature. Higher water mixing speeds are  
233 concomitant with increased rates of heat exchange which can thereby accelerate the speed at  
234 which thermal pain is induced. To test this effect, we performed the tail withdrawal assay on six  
235 WMI males at different water mixing speeds (low, medium, and high) at  $48$  °C  $\pm 0.25$ . As shown  
236 in Fig. 2B, we observed significantly shorter latencies at faster water mixing speeds with the  
237 longest latencies revealed when the water was not being mixed (i.e., still). These findings  
238 elucidate the importance of controlling water mixing speed throughout subsequent  
239 experimentation using the tail immersion assay.

240 One innovative aspect of *TailTimer* is the use of RFID as the primary user data input  
241 device. Rodent behavioral tests are usually conducted in tight spaces in which gloves are  
242 mandatory. This unique work environment poses challenges for using a keyboard/mouse  
243 combination or touch screens as primary data input devices. We therefore adapted the RFID  
244 system, primarily used to record the identity of the animals, for use as the primary user interface  
245 which can be operated by scanning unique RFID fobs. This implementation provides a  
246 convenient solution for entering predetermined information, such as user ID, selection of  
247 temperature, progression to the next step, repetition of the measure, etc. The RFID reader we use  
248 has a USB interface and is easy to program. Although a keyboard can still be used with  
249 *TailTimer*, we almost always use the RFID system because of its convenience.

250 It is worth noting that *TailTimer* does not include methods of restraining rats that have  
251 been utilized across many extant tail immersion studies. The use of restraining methods during  
252 testing has been shown to induce additional stress and consequently affect tail withdrawal  
253 latency (Huang & Shyu, 1987; Ramabadran et al., 1989). Therefore, we chose to hold the rats  
254 without restraint throughout testing. Furthermore, our design does not include a heating device.  
255 Due to its general availability in the lab, we used a standard hot plate to maintain the target water  
256 temperature at  $\pm 0.25$  °C. Subsequent research may aim to establish an alternative to the hot plate  
257 that could provide increased temperature stability and thus further abate the degree of variability  
258 in water temperature across tests.

259 *TailTimer* is one of the many laboratory devices that uses the Raspberry Pi single-board  
260 computer. These computers encompass computing power that rivals desktop computers of the  
261 last decade at a small fraction of their predecessors' size and cost. A large part of the appeal of  
262 these computers is the vast array of external devices (i.e., sensors or motors) that can be

263 connected and controlled through the GPIO ports. Devices for operant conditioning (Longley et  
264 al., 2017; Mazziotti et al., 2020), conditioned place preference (Vassilev et al., 2020), head-fixed  
265 mesoscale cortical imaging (Murphy et al., 2020), and even virtual reality (Tadres & Louis,  
266 2020) have been reported. Further, a wide range of environmental factors (e.g., humidity,  
267 barometric pressure, and light) can be monitored using Raspberry Pi (Longley et al., 2017).  
268 Although some technical know-how is needed for making these devices, detailed instructions are  
269 generally available. Most of these devices are open source and can therefore be modified to fit  
270 new requirements. For example, it is feasible to use *TailTimer* with some modification to  
271 measure rectal temperature of rodents.

## 272 **Conclusions**

273 In summary, we report an open source, simple, and inexpensive device for measuring the tail  
274 withdrawal latency of rodents using the tail immersion assay. This device automatically records  
275 latencies, water temperature, and the identifications of both animals and technicians. It also  
276 limits the tests to be conducted only when the water is within  $\pm 0.25$  °C of the target temperature.  
277 We anticipate the increased ease of operation and reproducibility of tail withdrawal latency,  
278 provided by *TailTimer*, to augment its utility in nociception and addiction research.

## 279 **References**

- 280 **Fischer BD, Zimmerman EI, Picker MJ, Dykstra LA. 2008.** Morphine in combination with  
281 metabotropic glutamate receptor antagonists on schedule-controlled responding and thermal  
282 nociception. *The Journal of Pharmacology and Experimental Therapeutics* 324:732–739.
- 283 **Huang KH, Shyu BC. 1987.** Differential stress effects on responses to noxious stimuli as  
284 measured by tail-flick latency and squeak threshold in rats. *Acta Physiologica Scandinavica*  
285 129:401–406.
- 286 **Le Bars D, Gozariu M, Cadden SW. 2001.** Animal models of nociception. *Pharmacological*  
287 *Reviews* 53:597–652.
- 288 **Longley M, Willis EL, Tay CX, Chen H. 2017.** An open source device for operant licking in  
289 rats. *PeerJ* 5:e2981.
- 290 **Mazziotti R, Sagona G, Lupori L, Martini V, Pizzorusso T. 2020.** 3D Printable Device for  
291 Automated Operant Conditioning in the Mouse. *eNeuro* 7. DOI: 10.1523/ENEURO.0502-  
292 19.2020.
- 293 **Murphy TH, Michelson NJ, Boyd JD, Fong T, Bolanos LA, Bierbrauer D, Siu T, Balbi M,**  
294 **Bolanos F, Vanni M, LeDue JM. 2020.** Automated task training and longitudinal  
295 monitoring of mouse mesoscale cortical circuits using home cages. *eLife* 9. DOI:  
296 10.7554/eLife.55964.
- 297 **Picker MJ, Daugherty D, Henry FE, Miller LL, Dykstra LA. 2011.** Metabotropic glutamate  
298 antagonists alone and in combination with morphine: comparison across two models of  
299 acute pain and a model of persistent, inflammatory pain. *Behavioural Pharmacology*  
300 22:785–793.
- 301 **Ramabadran K, Bansinath M, Turndorf H, Puig MM. 1989.** Tail immersion test for the  
302 evaluation of a nociceptive reaction in mice. *Journal of Pharmacological Methods* 21:21–  
303 31. DOI: 10.1016/0160-5402(89)90019-3.

- 304 **Tadres D, Louis M. 2020.** PiVR: An affordable and versatile closed-loop platform to study  
305 unrestrained sensorimotor behavior. *PLoS Biology* 18:e3000712.
- 306 **Vassilev P, Salim M, Popescu C, Flores C, Hernandez G. 2020.** Low-cost conditioned place  
307 preference setup including video recording and analysis of behaviour. *MethodsX* 7:100899.
- 308 **Zhou Q, Bao Y, Zhang X, Zeng L, Wang L, Wang J, Jiang W. 2014.** Optimal interval for hot  
309 water immersion tail-flick test in rats. *Acta Neuropsychiatrica* 26:218–222.



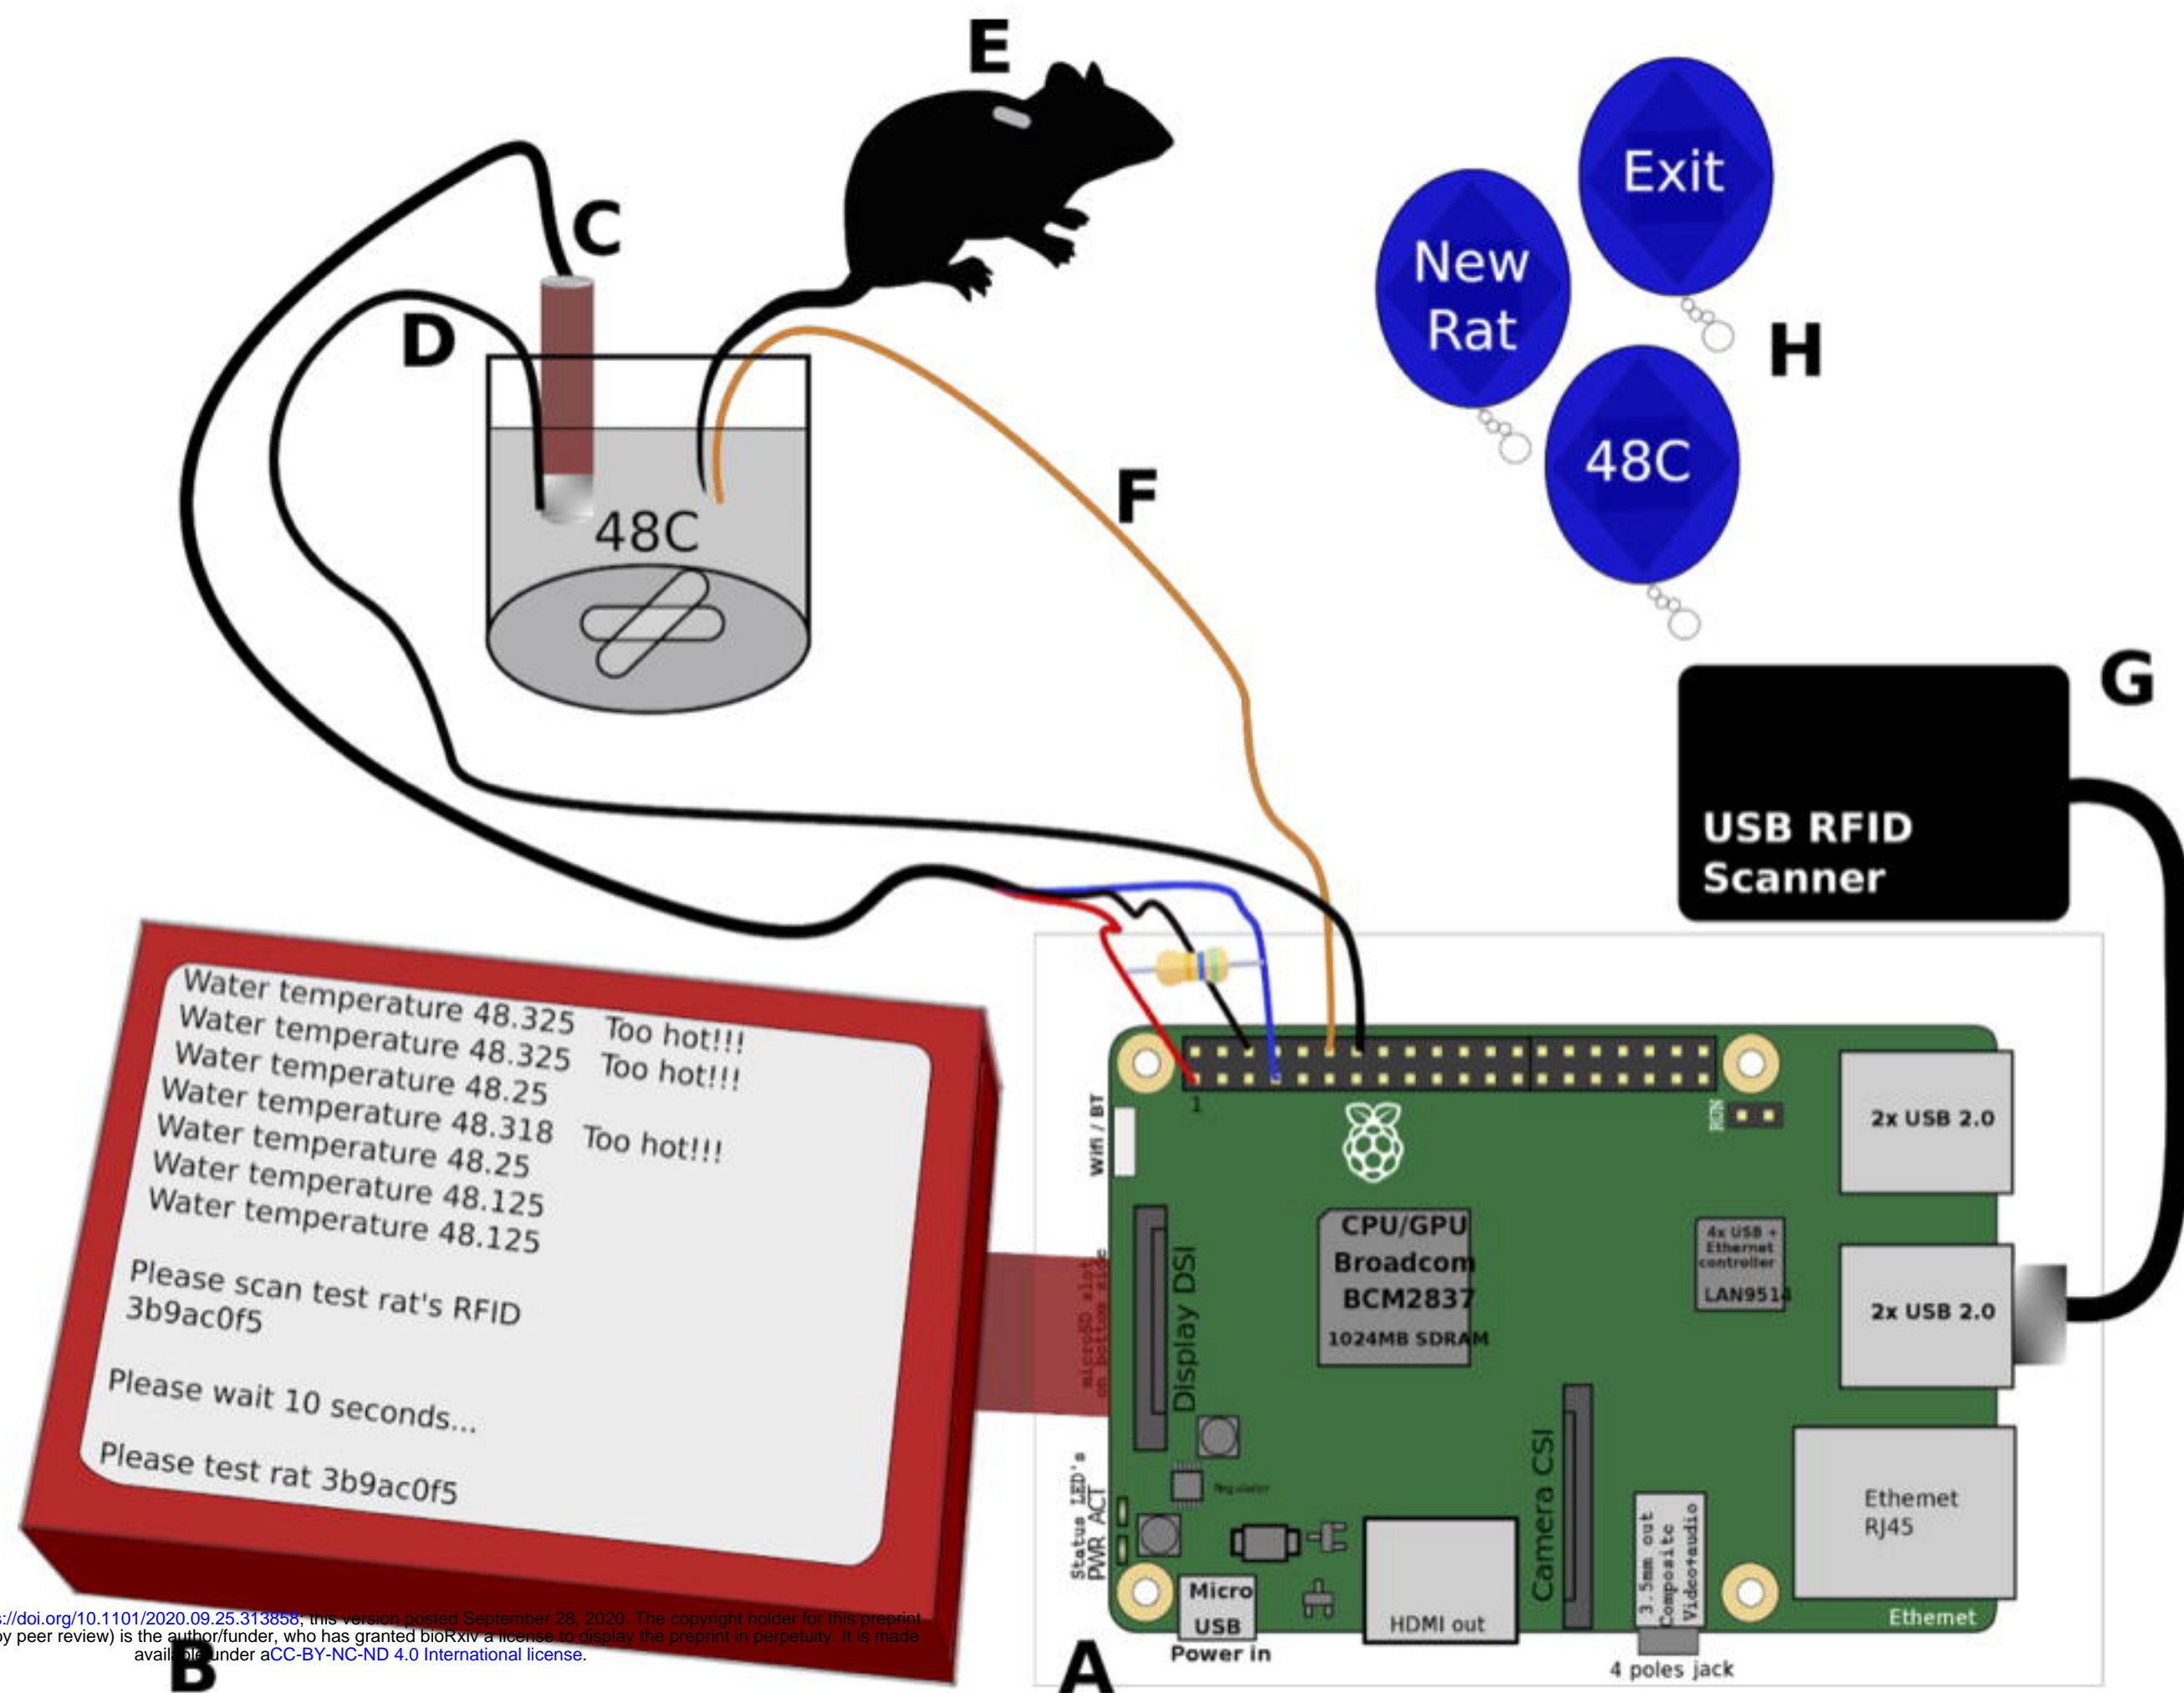

bioRxiv preprint doi: <https://doi.org/10.1101/2020.09.25.313858>; this version posted September 28, 2020. The copyright holder for this preprint (which was not certified by peer review) is the author/funder, who has granted bioRxiv a license to display the preprint in perpetuity. It is made available under aCC-BY-NC-ND 4.0 International license.

**Figure 1. Components of the *TailTimer* device for use in the tail immersion assay. (A)** The RP3 computer. **(B)** The *TailTimer* software in operation. **(C)** Thermal probe to detect water temperature. **(D)** Electrical ground wire that remains immersed in the water with the thermal probe (C). **(E)** Scannable RFID implanted subcutaneously in the rat for identification. **(F)** Electrical latency wire to be dipped into and withdrawn from the water simultaneously with the rat's tail to start and stop the timer, respectively. **(G)** USB RFID scanner. **(H)** Scannable RFID command fobs used to navigate the *TailTimer* program in place of a keyboard and mouse. The six necessary fobs are used to enter the user ID, set the target temperature, start a new rat, test the same rat again, delete the last latency, and exit the program.



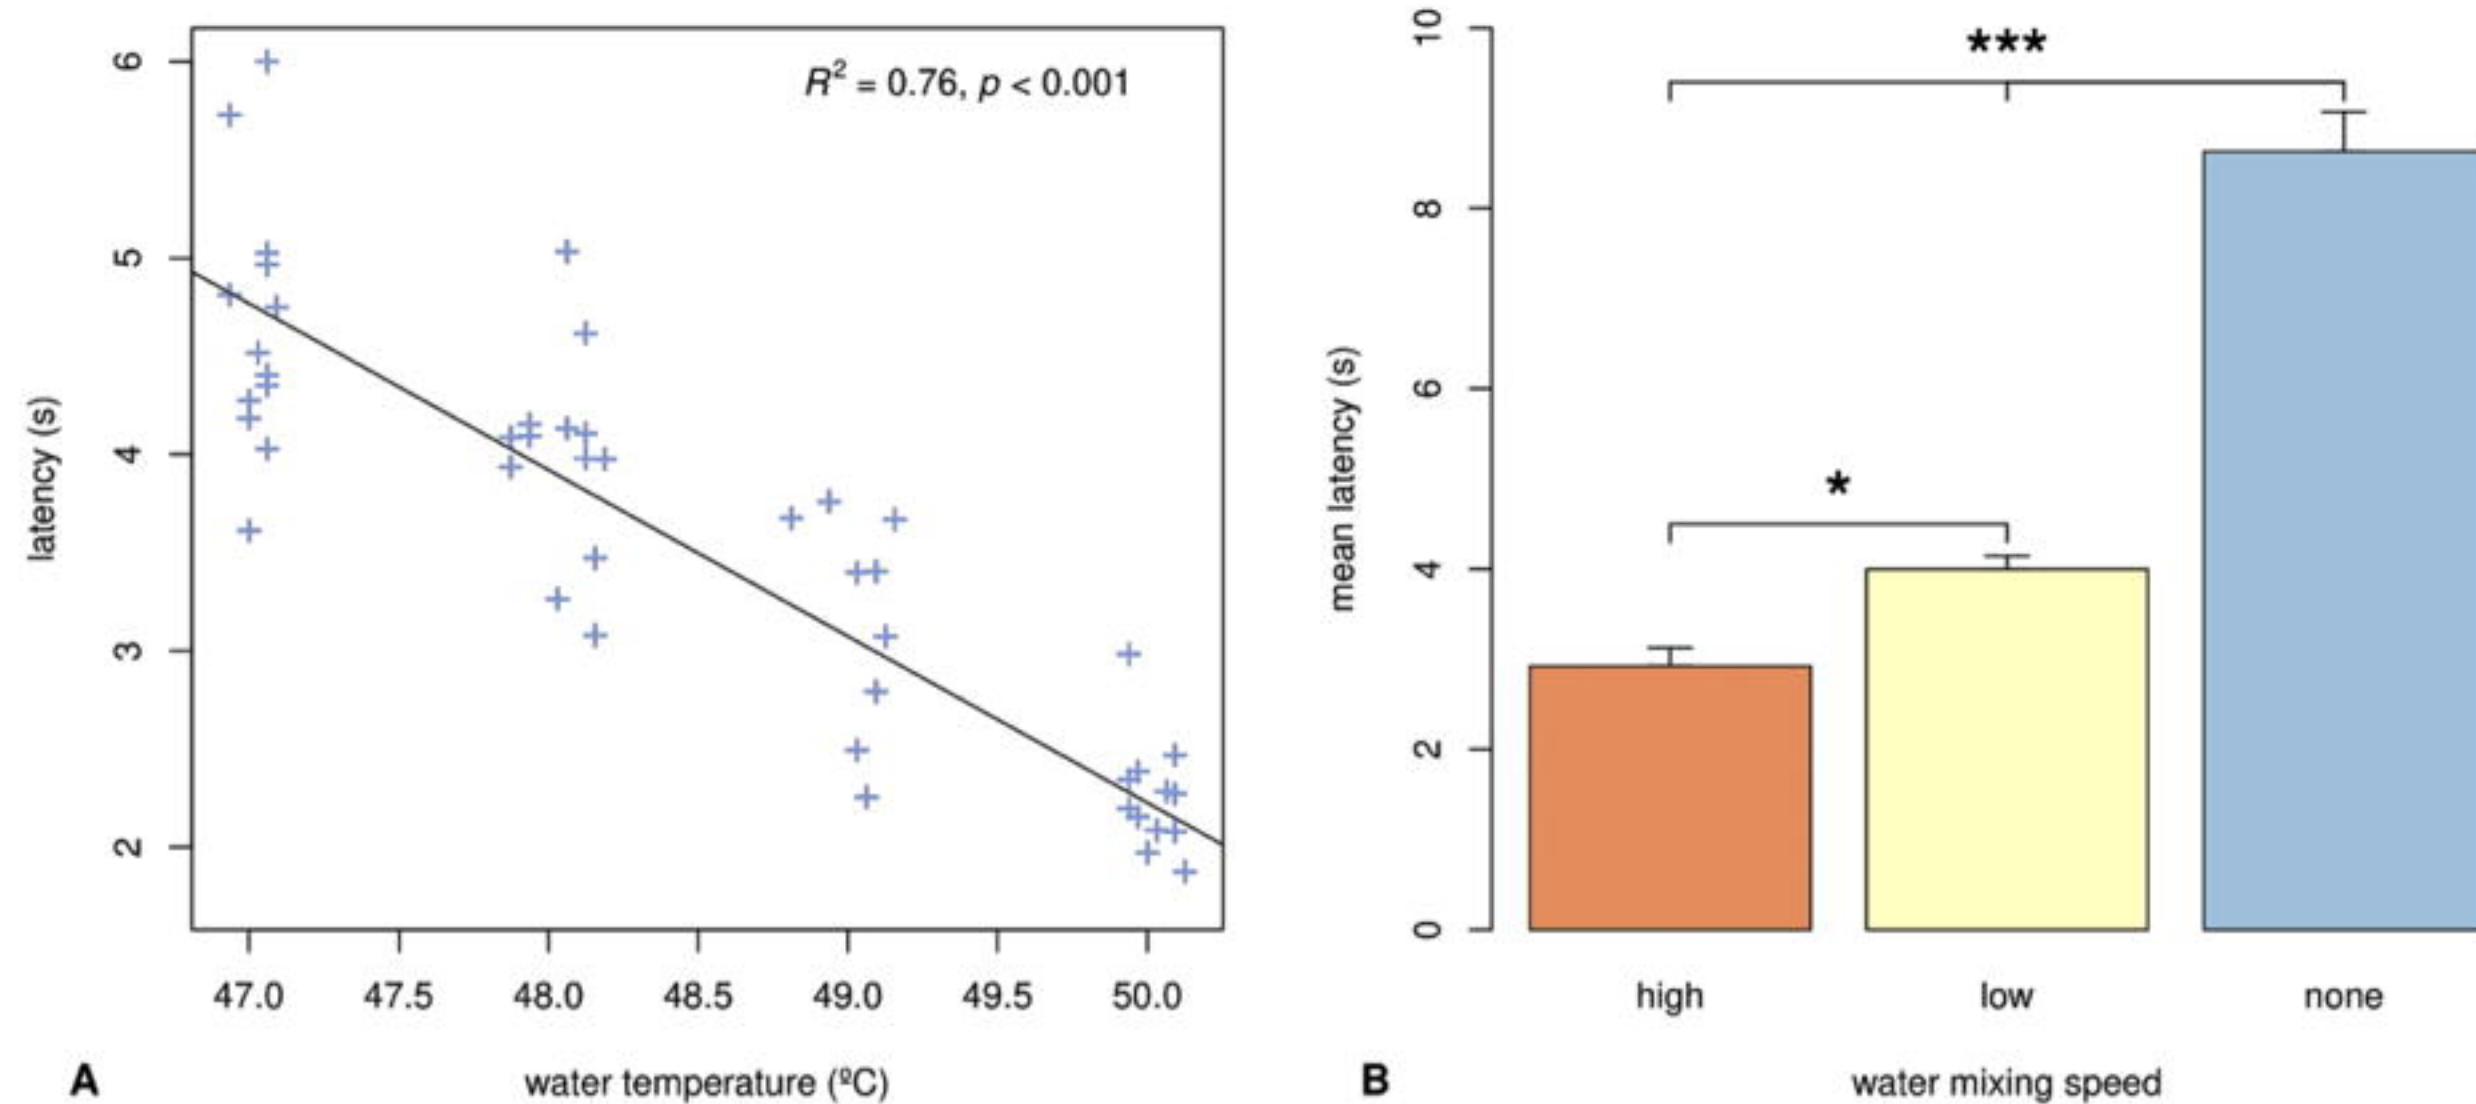

**Figure 2.** (A) **Tail withdrawal latency measured at different water temperatures.** These findings demonstrate the concomitance between water temperature and latency length. As water temperature is decreased, latency is lengthened. Linear regression indicated that temperature explains 76% of the variance in latency when tested between 47 - 50 °C. (B) **Tail withdrawal latency measured at different water mixing speeds.** Lengthening of latency occurs as the water mixing speed is decreased with the longest latencies occurring when the water is still (i.e., not being mixed by the stir bar). Data are expressed as mean  $\pm$  SEM; \* $p < 0.05$ , \*\*\* $p < 0.001$ .

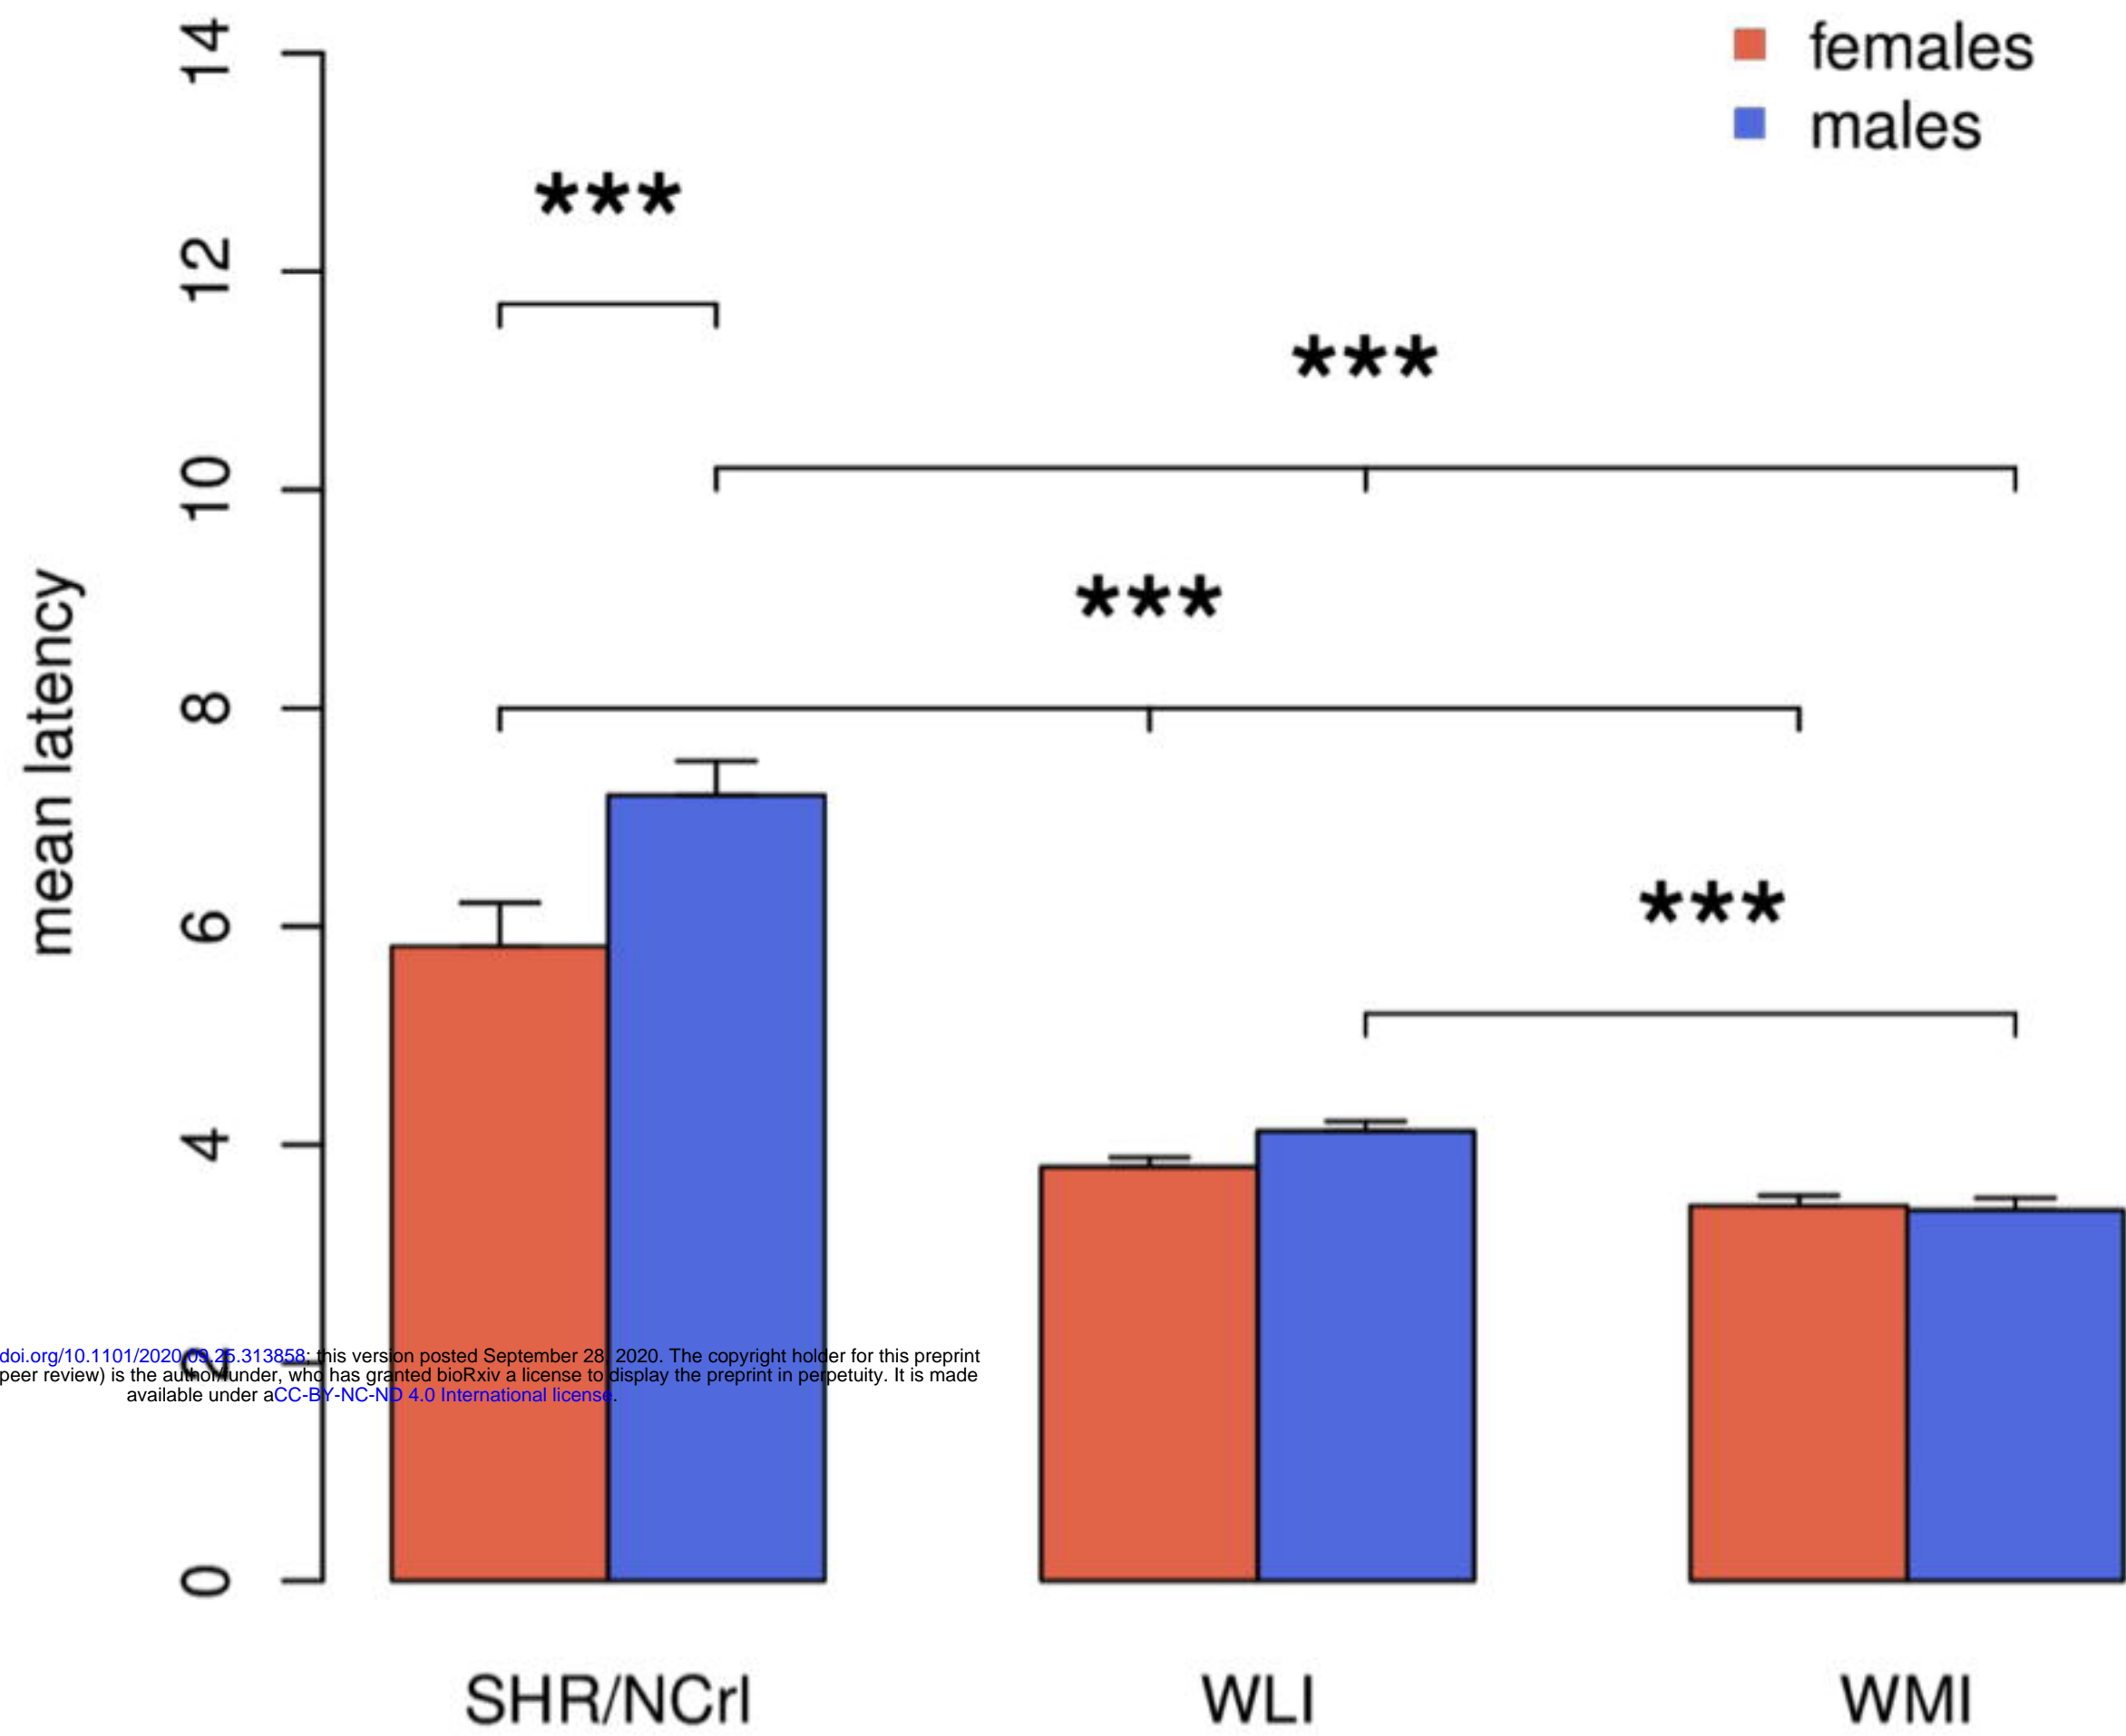

**Figure 3. Tail withdrawal latency by sex and strain.** Mean latencies reflect the average of the (two - four) tests per individual rat averaged across sex and strain. Data are expressed as mean  $\pm$  SEM; \*\*\* $p < 0.001$ .
